# Supplementary material
Source: PubMed Central journal article supplement (PMC7728545)
Supplement: NIHMS1595121-supplement-7.pdf [file NIHMS1595121-supplement-7.pdf]

**Table S1. Crystallographic statistics, Related to Figures 1, 2, and 3**

|                                              | <b>AbCap4<br/>Apo</b>  | <b>AbCap4–2'3'3'-cAAA</b>           | <b>AbCap4–3'3'3'-cAAA</b>           | <b>AbCap4–2'3'3'-cAAA<br/>(SeMet)</b> |
|----------------------------------------------|------------------------|-------------------------------------|-------------------------------------|---------------------------------------|
| <b>Data Collection</b>                       |                        |                                     |                                     |                                       |
| Resolution (Å) <sup>a</sup>                  | 39.60–2.60 (2.64–2.60) | 49.21–2.10 (2.14–2.10)              | 38.80–2.40 (2.44–2.40)              | 49.46–2.45 (2.49–2.45)                |
| Wavelength (Å)                               | 0.97918                | 0.97918                             | 0.97918                             | 0.97918                               |
| Space group                                  | P 1 2 <sub>1</sub> 1   | P 1 2 <sub>1</sub> 1                | P 1 2 <sub>1</sub> 1                | P 1 2 <sub>1</sub> 1                  |
| Unit cell: a, b, c (Å)                       | 99.72 111.38 173.30    | 106.58, 111.46, 164.83              | 106.50 111.18 163.75                | 106.37, 112.23, 163.35                |
| Unit cell: $\alpha$ , $\beta$ , $\gamma$ (°) | 90.00 103.06 90.00     | 90.00, 100.21, 90.00                | 90.00 100.36 90.00                  | 90.00, 100.03, 90.00                  |
| Molecules per ASU                            | 6                      | 6                                   | 6                                   | 6                                     |
| Total reflections                            | 335131                 | 1567459                             | 519258                              | 3953693                               |
| Unique reflections                           | 100775                 | 217277                              | 145531                              | 138853                                |
| Completeness (%) <sup>a</sup>                | 88.7 (48.8)            | 98.3 (95.5)                         | 99.0 (86.2)                         | 99.9 (99.9)                           |
| Multiplicity <sup>a</sup>                    | 3.3 (2.2)              | 7.2 (7.1)                           | 3.6 (3.1)                           | 28.5 (27.8)                           |
| $I/\sigma^a$                                 | 12.9 (2.3)             | 12.4 (1.6)                          | 8.4 (1.0)                           | 14.1 (1.3)                            |
| CC(1/2) <sup>b</sup> (%) <sup>a</sup>        | 99.7 (80.8)            | 99.8 (55.0)                         | 99.6 (42.8)                         | 99.9 (66.4)                           |
| Rpim <sup>c</sup> (%) <sup>a</sup>           | 3.8 (29.9)             | 4.2 (81.1)                          | 5.8 (88.1)                          | 3.4 (63.3)                            |
| Sites                                        |                        |                                     |                                     | 36                                    |
| <b>Refinement</b>                            |                        |                                     |                                     |                                       |
| Resolution (Å)                               | 39.60–2.60             | 49.21–2.10                          | 38.62–2.40                          |                                       |
| Free reflections                             | 1993                   | 2000                                | 2000                                |                                       |
| R-factor / R-free                            | 19.2 / 23.1            | 18.5 / 21.9                         | 20.8 / 24.0                         |                                       |
| Bond distance (RMS Å)                        | 0.004                  | 0.003                               | 0.002                               |                                       |
| Bond angles (RMS °)                          | 0.59                   | 0.53                                | 0.50                                |                                       |
| <b>Structure/Stereochemistry</b>             |                        |                                     |                                     |                                       |
| No. atoms: protein                           | 20800                  | 21078                               | 20894                               |                                       |
| No. atoms: ligand                            | 30 (SO <sub>4</sub> )  | 370 (2'3'3'-cAAA, SO <sub>4</sub> ) | 426 (3'3'3'-cAAA, SO <sub>4</sub> ) |                                       |
| No. atoms: solvent                           | 317                    | 1490                                | 492                                 |                                       |
| Average B-factor: protein                    | 51.64                  | 54.03                               | 65.48                               |                                       |
| Average B-factor: ligand                     | 58.79                  | 69.46                               | 64.86                               |                                       |
| Average B-factor: water                      | 41.14                  | 50.34                               | 52.51                               |                                       |
| Ramachandran plot: favored                   | 97.46%                 | 97.84%                              | 96.73%                              |                                       |
| Ramachandran plot: allowed                   | 2.50%                  | 2.16%                               | 3.19%                               |                                       |
| Ramachandran plot: outliers                  | 0.04%                  | 0%                                  | 0.08%                               |                                       |
| Rotamer outliers                             | 1.81%                  | 0.68%                               | 0.86%                               |                                       |
| MolProbity <sup>d</sup> score                | 1.48                   | 1.29                                | 1.29                                |                                       |
| Protein Data Bank ID                         | 6WAM                   | 6VM6                                | 6WAN                                |                                       |

<sup>a</sup> Highest resolution shell values in parenthesis

<sup>b</sup> (Karplus and Diederichs, 2012)

<sup>c</sup> (Weiss, 2001)

<sup>d</sup> (Chen et al., 2010)

**Table S1. Crystallographic Statistics, Related to Figures 1, 2, and 3**

|                                              | <b>MoCap4<br/>Apo</b>  | <b>MoCap4<br/>(SeMet)</b> |
|----------------------------------------------|------------------------|---------------------------|
| <b>Data Collection</b>                       |                        |                           |
| Resolution (Å) <sup>a</sup>                  | 49.36–2.34 (2.43–2.34) | 49.30–2.80 (2.95–2.80)    |
| Wavelength (Å)                               | 0.99998                | 0.97949                   |
| Space group                                  | P 3 <sub>2</sub> 2 1   | P 3 <sub>2</sub> 2 1      |
| Unit cell: a, b, c (Å)                       | 157.59, 157.59, 63.32  | 157.82, 157.82, 63.16     |
| Unit cell: $\alpha$ , $\beta$ , $\gamma$ (°) | 90.0, 90.0, 120.0      | 90.0, 90.0, 120.0         |
| Molecules per ASU                            | 1                      | 1                         |
| Total reflections                            | 423237                 | 2521929                   |
| Unique reflections                           | 37860                  | 22581                     |
| Completeness (%) <sup>a</sup>                | 99.2 (92.4)            | 99.8 (98.8)               |
| Multiplicity <sup>a</sup>                    | 11.2 (10.6)            | 111.7 (108.1)             |
| $I/\sigma^a$                                 | 15.3 (0.9)             | 19.8 (1.7)                |
| CC(1/2) <sup>b</sup> (%) <sup>a</sup>        | 99.9 (41.3)            | 100 (69.5)                |
| Rpim <sup>c</sup> (%) <sup>a</sup>           | 3.2 (89.5)             | 3.2 (60.8)                |
| Sites                                        |                        | 5                         |
| <b>Refinement</b>                            |                        |                           |
| Resolution (Å)                               | 49.36–2.35             |                           |
| Free reflections                             | 2004                   |                           |
| R-factor / R-free                            | 20.7 / 23.4            |                           |
| Bond distance (RMS Å)                        | 0.006                  |                           |
| Bond angles (RMS °)                          | 0.710                  |                           |
| <b>Structure/Stereochemistry</b>             |                        |                           |
| No. atoms: protein                           | 3385                   |                           |
| No. atoms: ligand                            | 1 (Mg)                 |                           |
| No. atoms: solvent                           | 67                     |                           |
| Average B-factor: protein                    | 83.51                  |                           |
| Average B-factor: ligand                     | 99.78                  |                           |
| Average B-factor: water                      | 65.29                  |                           |
| Ramachandran plot: favored                   | 97.07%                 |                           |
| Ramachandran plot: allowed                   | 2.93%                  |                           |
| Ramachandran plot: outliers                  | 0.0%                   |                           |
| Rotamer outliers                             | 0.0%                   |                           |
| MolProbity <sup>d</sup> score                | 1.46                   |                           |
| Protein Data Bank ID                         | 6VM5                   |                           |

<sup>a</sup> Highest resolution shell values in parenthesis

<sup>b</sup> (Karplus and Diederichs, 2012)

<sup>c</sup> (Weiss, 2001)

<sup>d</sup> (Chen et al., 2010)
