# Supplementary material
Source: PubMed Central journal article supplement (PMC7728545)

**A**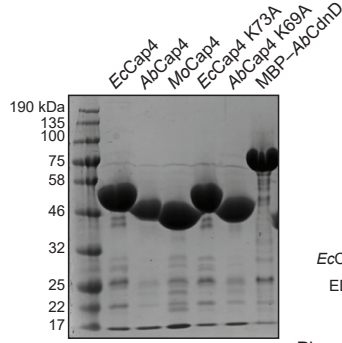**B**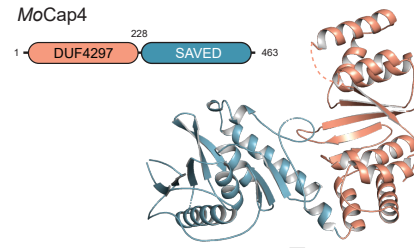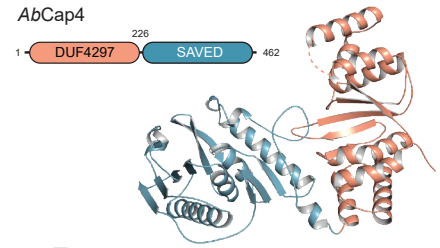**D**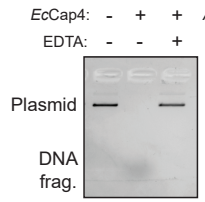**E**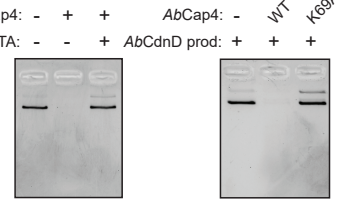**F**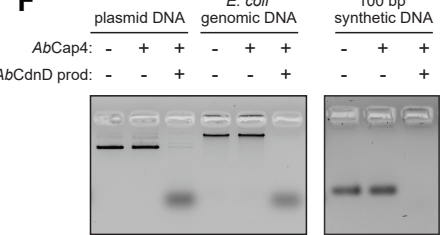**C**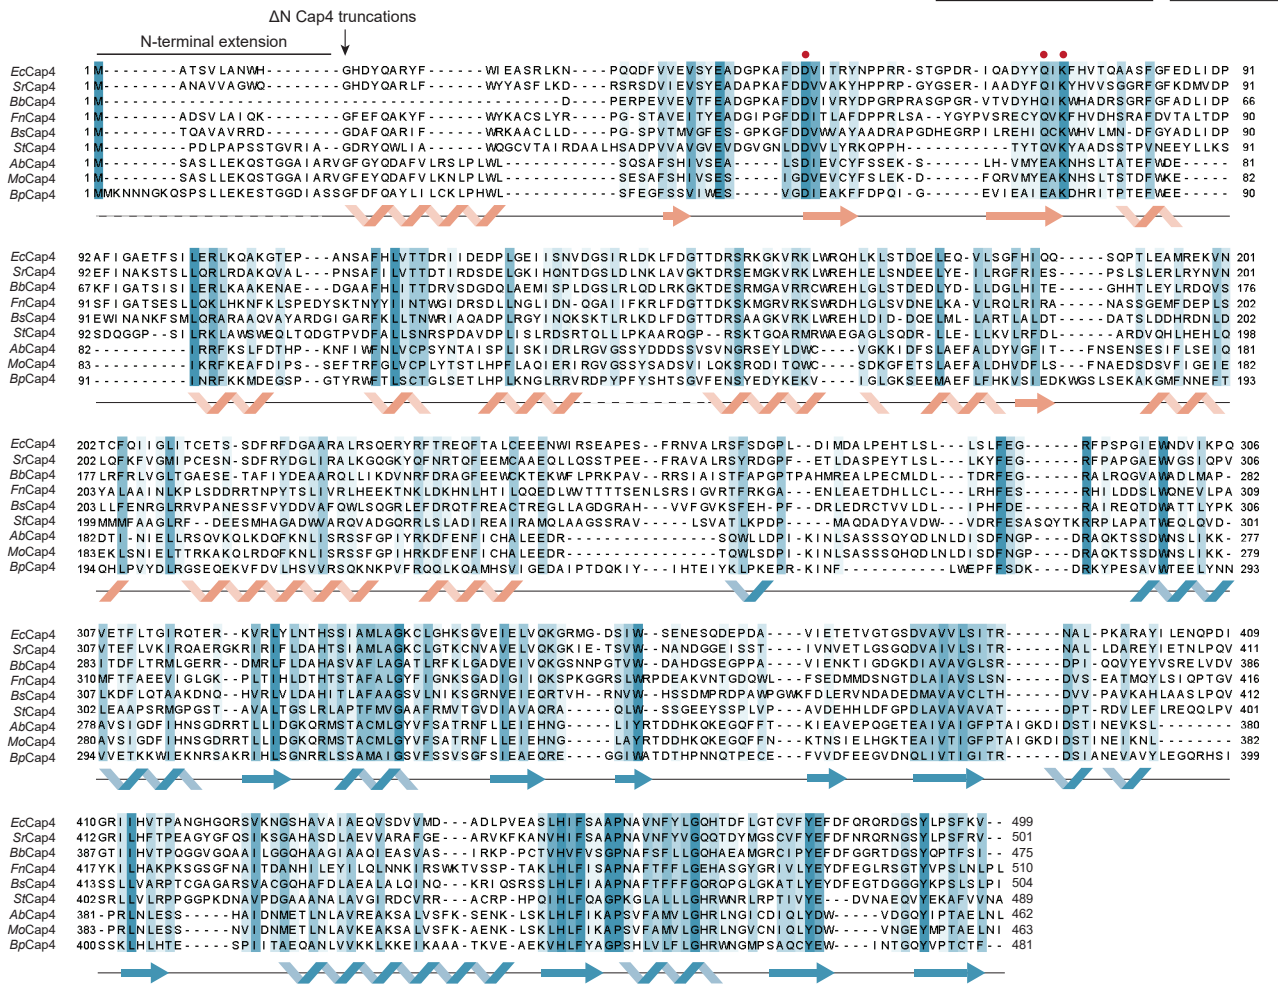

Supplement: NIHMS1595121-supplement-1.pdf [file NIHMS1595121-supplement-1.pdf]

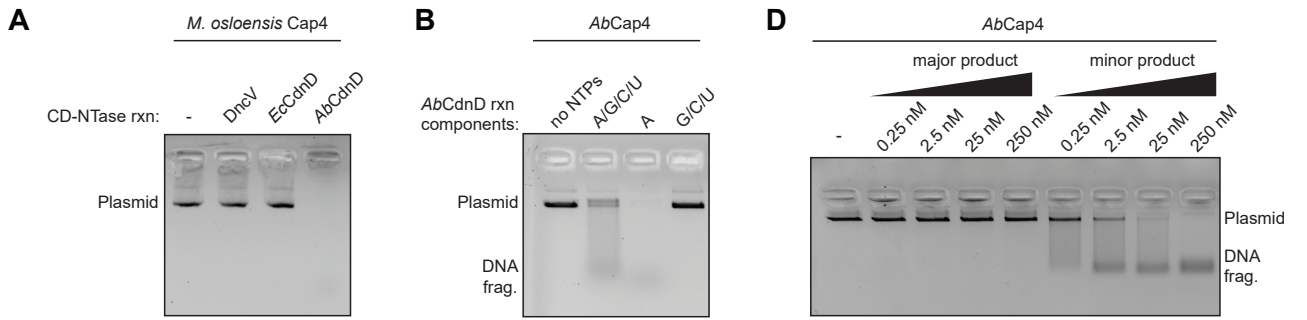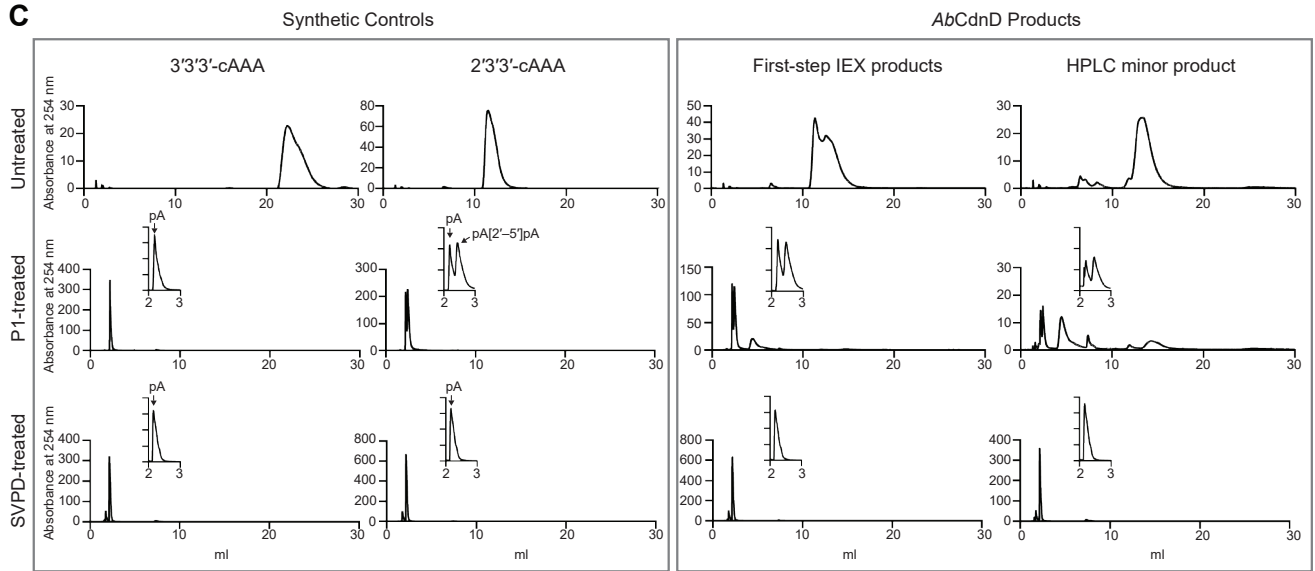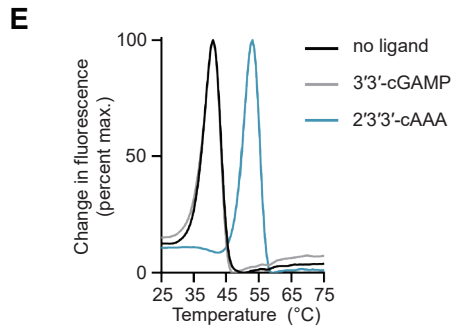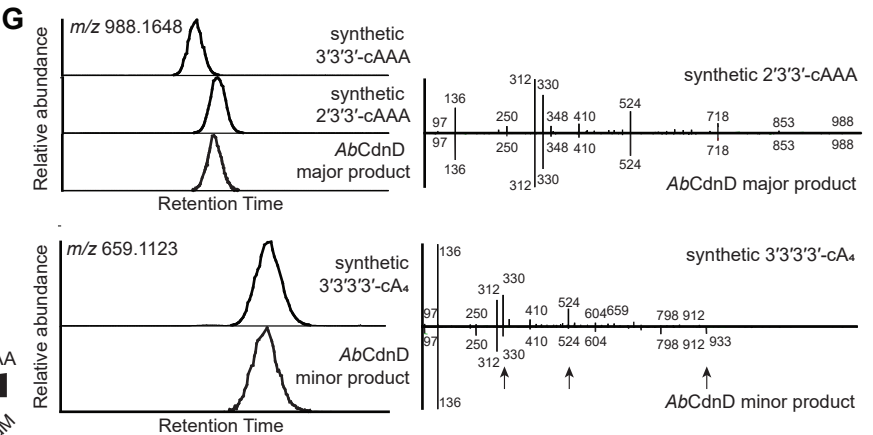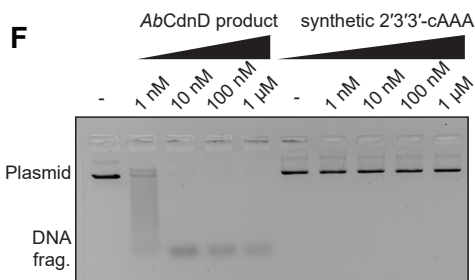

Supplement: NIHMS1595121-supplement-2.pdf [file NIHMS1595121-supplement-2.pdf]

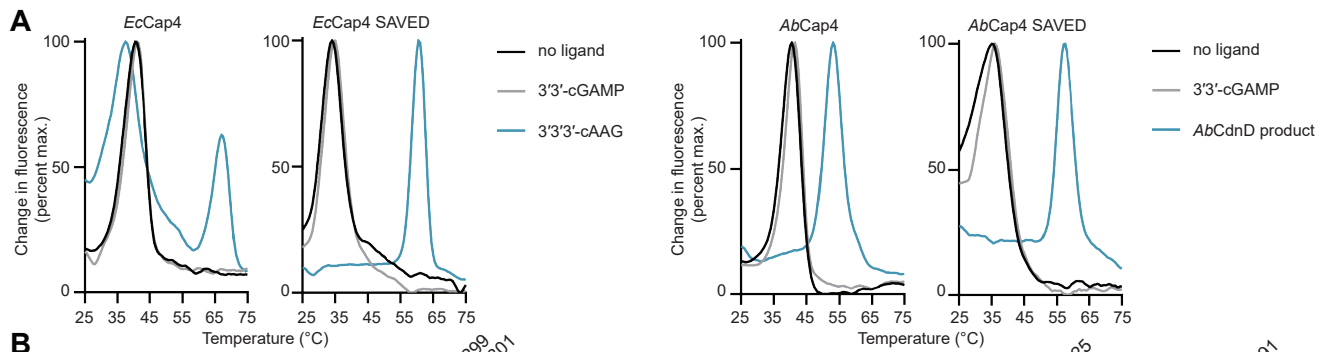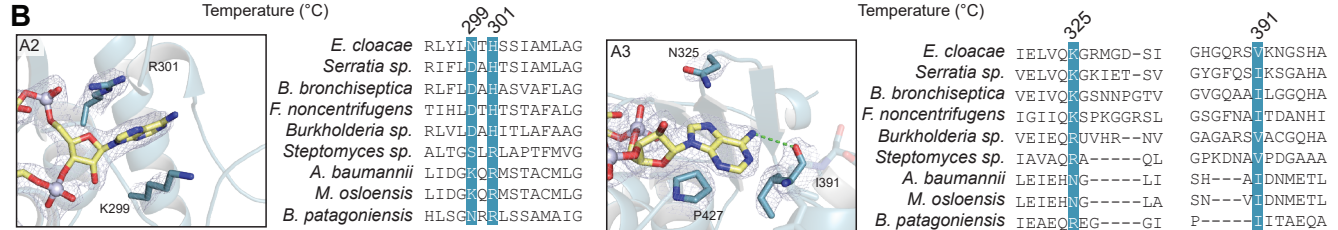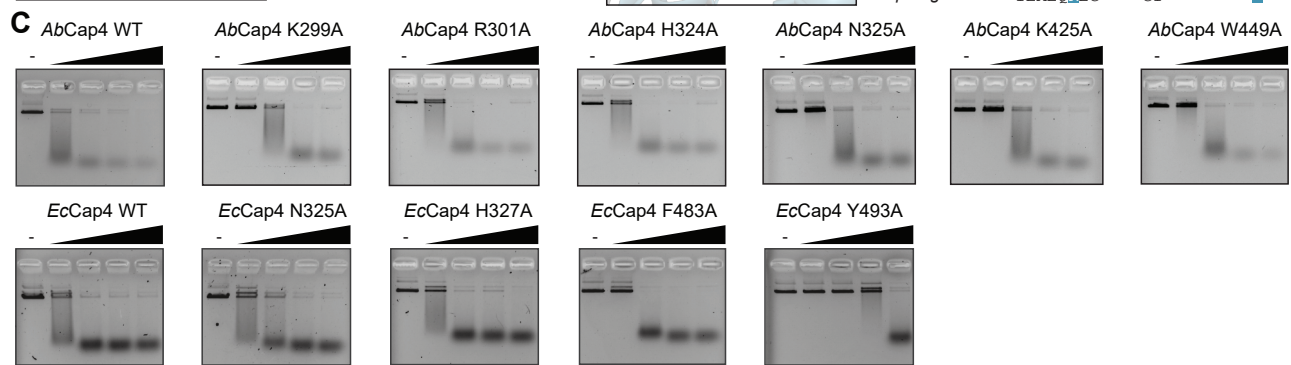

Supplement: NIHMS1595121-supplement-3.pdf [file NIHMS1595121-supplement-3.pdf]

**Figure S4.** Analysis of Cap4 ligand-bound and apo structures, related to Figure 3

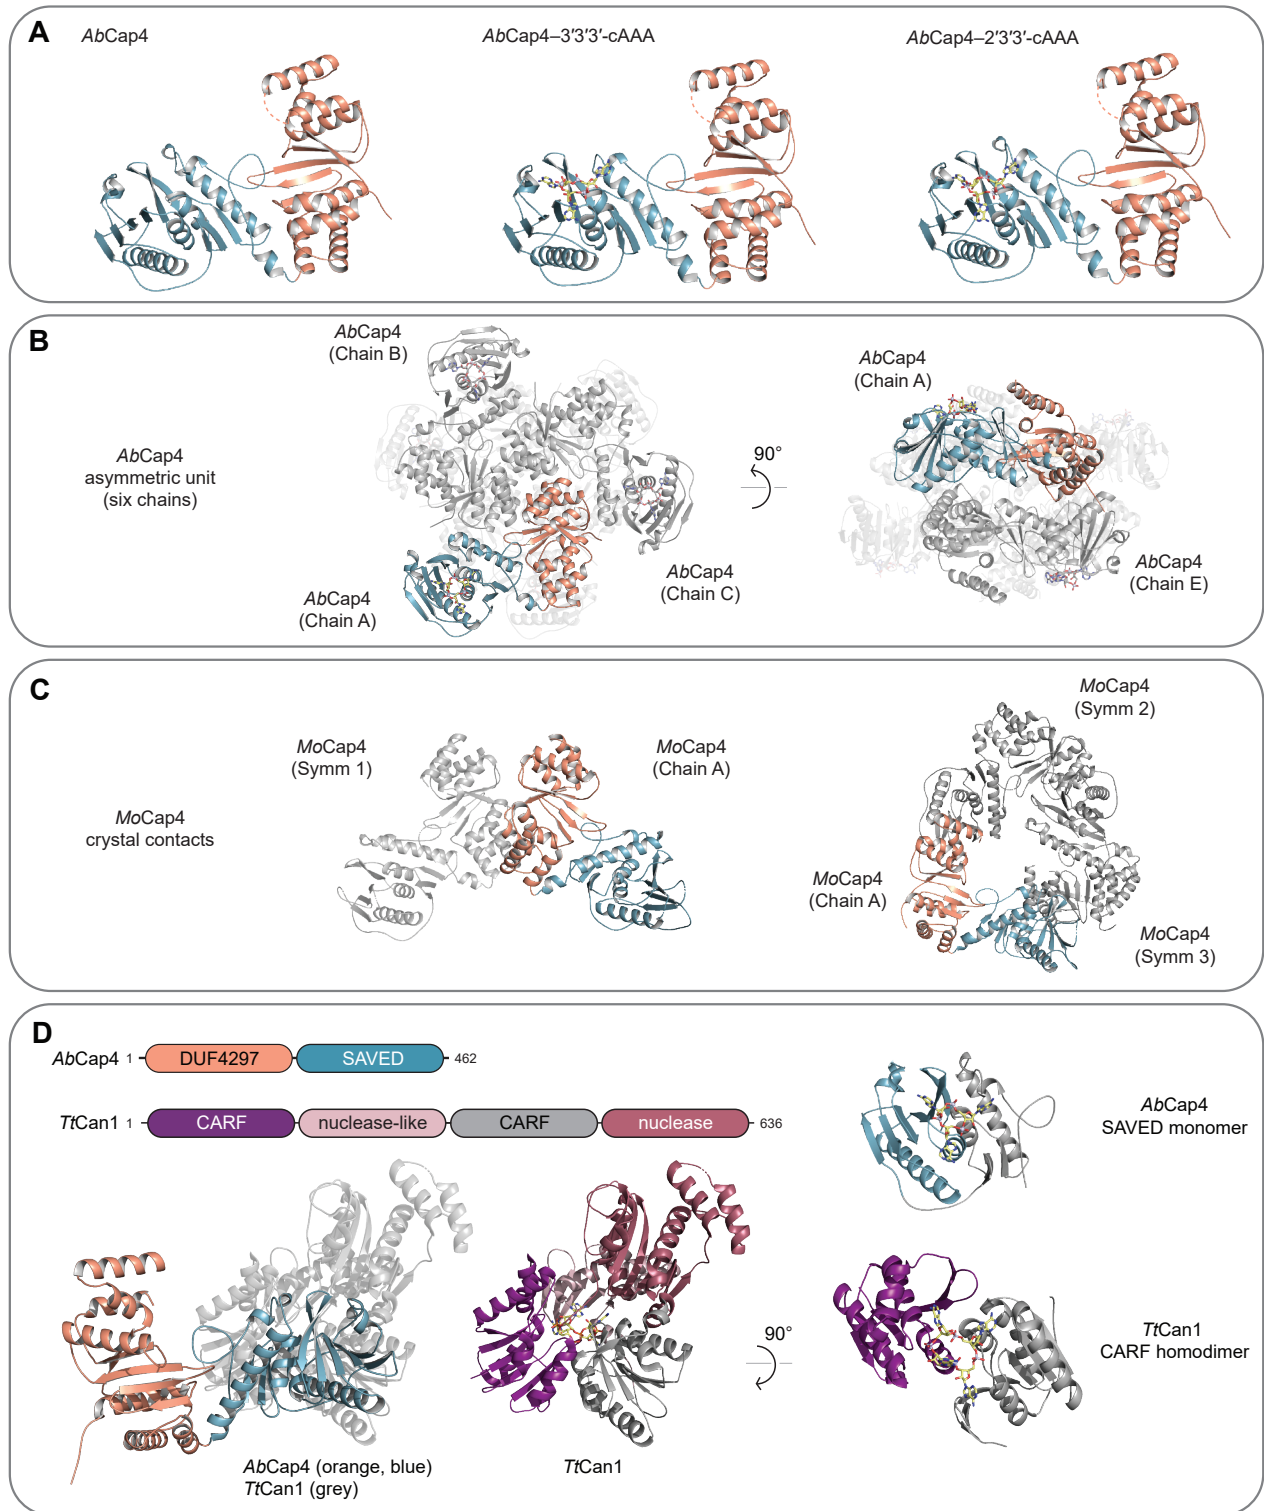

Supplement: NIHMS1595121-supplement-4.pdf [file NIHMS1595121-supplement-4.pdf]

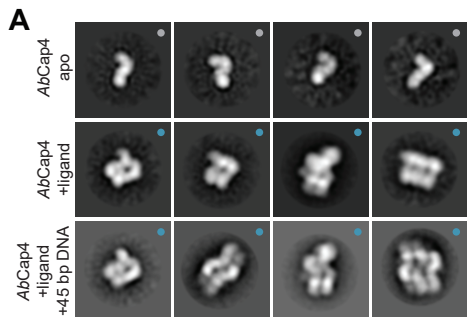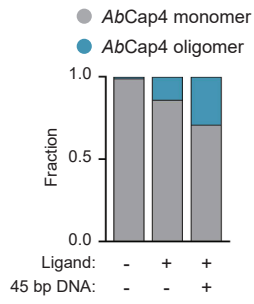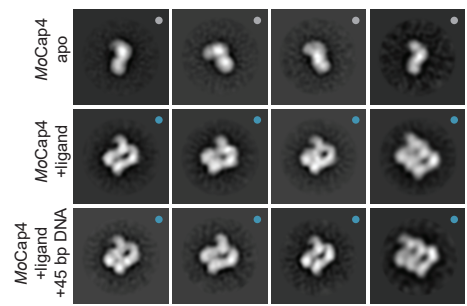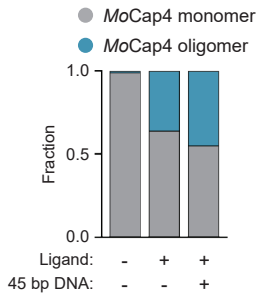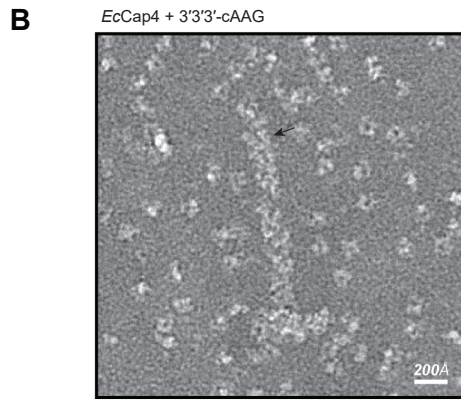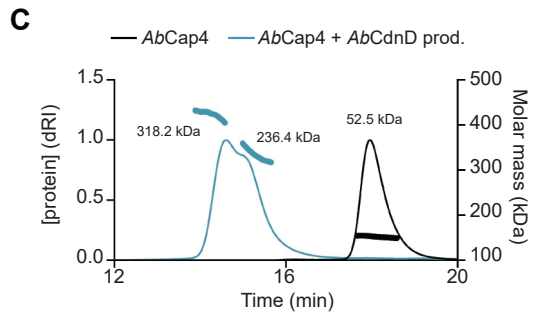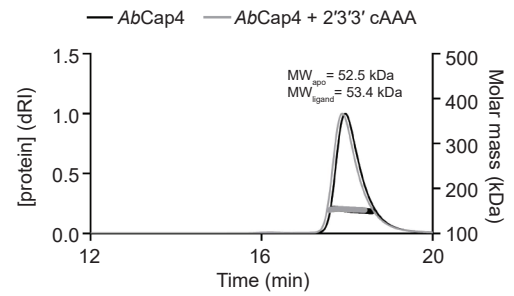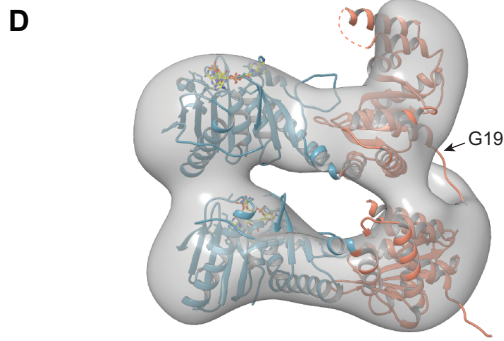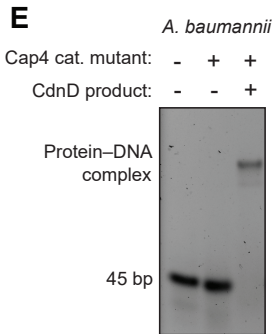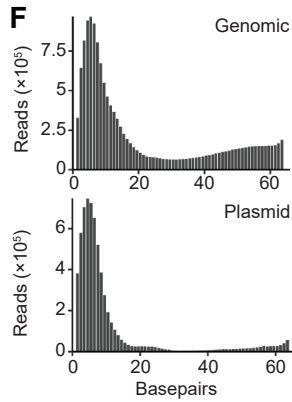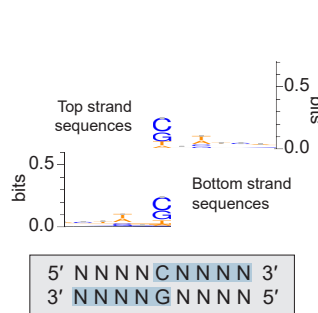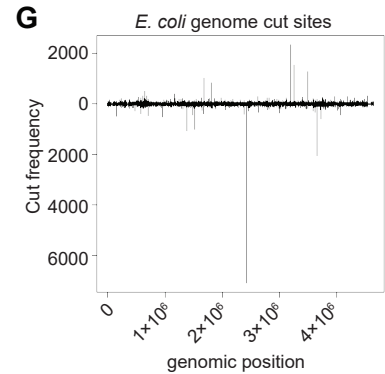

Supplement: NIHMS1595121-supplement-5.pdf [file NIHMS1595121-supplement-5.pdf]

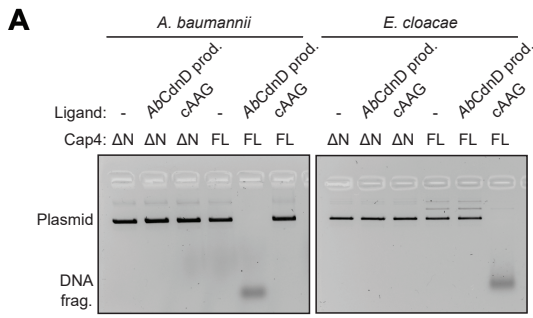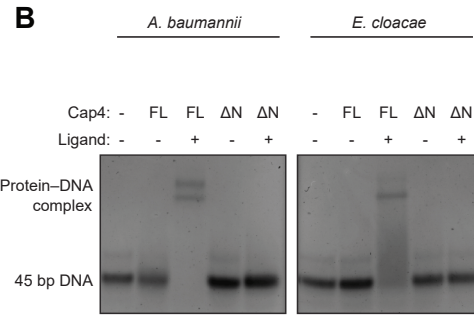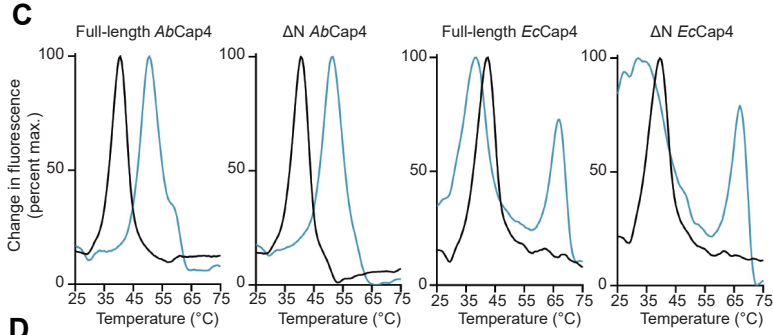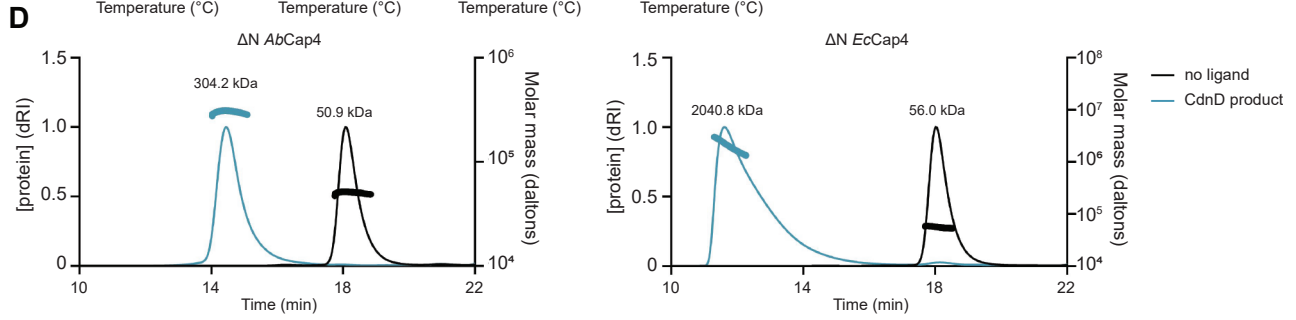

Supplement: NIHMS1595121-supplement-6.pdf [file NIHMS1595121-supplement-6.pdf]
